# Supplementary material
Source: MDPI journal article supplement (https://www.mdpi.com/2673-3846/4/1/4)
Supplement: s1 [file s1]

## **PATIENT DETAILS.**

Age: 69 years Sex: M Caucasian, Patient Class: Outpatient Patient Loc. Height: 173 cm Weight: 64 kg BSA: 1.8 m<sup>2</sup> BP: 169/76 mmHg Rhythm: sinus bradycardia HR: 57 bpm

## **Echocardiogram Results**

Left Ventricle: Normal size based on linear index dimension. Normal systolic function. Ejection fraction = 60 %. No regional wall motion abnormalities. Normal relative wall thickness and LV mass. Indeterminate diastolic function. Indeterminate filling pressure. Right Ventricle: Normal size by linear dimension. Normal systolic function. Left Atrium: Severely dilated by biplane volume index. Right Atrium: Dilated by volume index. Mitral Valve: Normal valve leaflets. Trivial regurgitation. Tricuspid Valve: Normal valve leaflets. Normal mobility of the leaflets. Mild regurgitation. Aortic Valve: Trileaflet valve; sclerosis. No restriction of cusp motion. Trivial valvular regurgitation. Pulmonary Valve/Artery: Not well seen. Trivial regurgitation. Normal pulmonary artery systolic pressure: 33 mmHg. Aorta: Normal sinuses of Valsalva by index dimension. Normal sinuses of Valsalva by linear dimension. Dilated proximal ascending aorta by index dimension. Normal proximal ascending aorta by linear dimension. Venous: Inferior vena cava is normal size with greater than 50% respiratory variation. Pericardium/Other: No pericardial effusion. Shunts: Atrial septal aneurysm present. No shunt by color flow Doppler to suggest PFO/ASD.

**Measurements:** Left Ventricle: Normal IVSd: 10 mm (6-10) LVPWd: 10 mm (6-10) LVIDd: 48 mm (42-58) LVIDd index: 27 mm/m<sup>2</sup> (22-30) LVIDs: 28 mm (25-40) LV EF (Visual): 60 % (52-72) LV Mass index: 91.4 g/m<sup>2</sup> (49-115) LV RWT: 0.41 (17) Right Atrium Normal RA Volume index: \*58 ml/m<sup>2</sup> (18-39) Aorta: Normal Aorta Sinuses: 32 mm (≤40) Aorta Sinuses index: 18 mm/m<sup>2</sup> (≤21) Prox Asc Aorta: 37 mm (≤38) Prox Asc Aorta index: \*21 mm/m<sup>2</sup> (≤19) TR Max Velocity: 2.8 m/s RA Pressure: 3 mmHg PASP: 33 mmHg
